# Supplementary material for: Improving gene set analysis of microarray data by SAM-GS
Source: Springer Nature journal article supplement (doi:10.1186/1471-2105-8-242), 2007-07-05

Histogram of Pearson correlation with the phenotype for 16,612 individual genes in the mouse-microarray kidney-transplant study

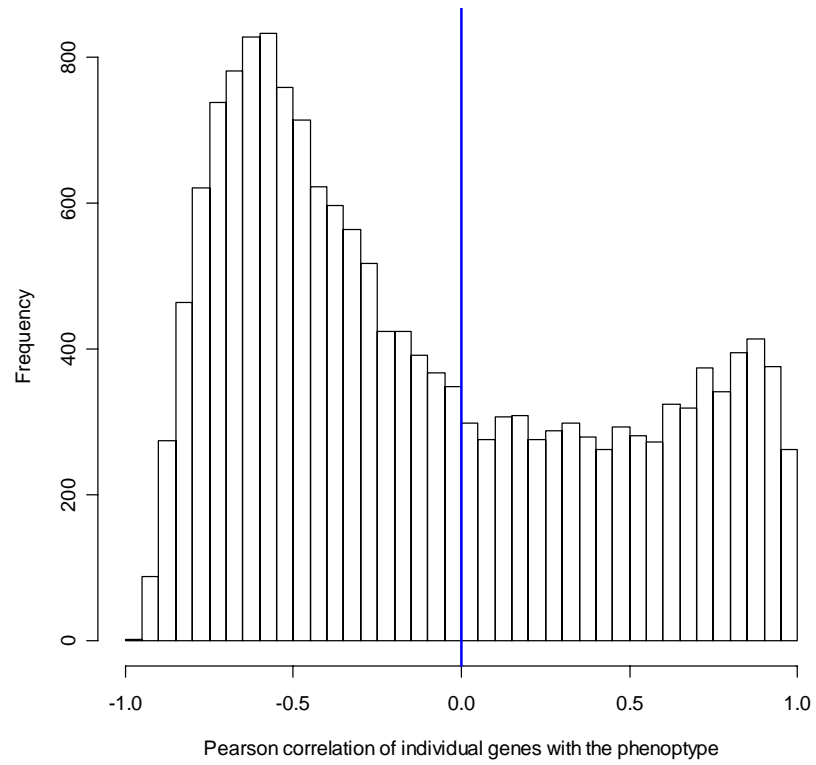

Supplement: Additional file 2 [file 1471-2105-8-242-s2.pdf]
